# Supplementary material
Source: PubMed Central journal article supplement (PMC9900495)
Supplement: NIHMS1866380-supplement-Supporting_information.pdf [file NIHMS1866380-supplement-Supporting_information.pdf]

## Supporting Information

**Title: Parallelization with Dual-Trap Single-Column Configuration Maximizes Throughput of Proteomic Analysis**

### Authors

Simion Kreimer<sup>1\*</sup>, Ali Haghani<sup>1</sup>, Aleksandra Binek<sup>1</sup>, Alisse Hauspurg<sup>2</sup>, Saeed Seyedmohammad<sup>1</sup>, Alejandro Rivas<sup>1</sup>, Amanda Momenzadeh<sup>1</sup>, Jesse G. Meyer<sup>1</sup>, Koen Raedschelders<sup>1</sup>, Jennifer E. Van Eyk<sup>1</sup>

- 1) Cedars-Sinai Medical Center 121 N San Vicente, Beverly Hills CA. USA 90211
- 2) University of Pittsburgh School of Medicine 300 Halket Street, Pittsburgh, PA 15213

\*Simion Kreimer: simion.kreimer@cshs.org

### Table of Contents

|                                                                                  |    |
|----------------------------------------------------------------------------------|----|
| Table S1. Autosampler control program                                            | S2 |
| Table S2. DIA isolation windows                                                  | S3 |
| Figure S1. Gas phase fractionated library for remote sampled blood               | S4 |
| Figure S2. PASEF-DIA scheme optimization                                         | S5 |
| Table S3. Scores of classifier models for differentiating hypertension phenotype | S6 |
| Figure S3. Performance across the cell lysate analysis                           | S7 |

| No | Command            | Parameters                                           |
|----|--------------------|------------------------------------------------------|
| 1  | UdpInjectMarker    |                                                      |
| 2  | UdpInjectValve     | Load                                                 |
| 3  | UdpDraw            | ReagentBVial, 25 [μl], 0.25 [μl/s], GlobalHeight     |
| 4  | UdpInjectValve     | Inject                                               |
| 5  | UdpDispense        | Drain, 25 [μl], 1 [μl/s], GlobalHeight               |
| 6  | UdpMixWait         | 60 [s]                                               |
| 7  | UdpInjectValve     | Load                                                 |
| 8  | UdpDraw            | ReagentAVial, 25 [μl], 0.25 [μl/s], GlobalHeight     |
| 9  | UdpDispense        | Drain, 25 [μl], 1 [μl/s], GlobalHeight               |
| 10 | UdpDraw            | ReagentAVial, 25.000 [μl], 0.25 [μl/s], GlobalHeight |
| 11 | UdpDispense        | Drain, 25.000 [μl], 1 [μl/s], GlobalHeight           |
| 12 | UdpMixWait         | 180 [s]                                              |
| 13 | UdpDraw            | SampleVial, 20 [μl], GlobalSpeed, GlobalHeight       |
| 14 | UdpDraw            | ReagentAVial, 2.4 [μl], GlobalSpeed, GlobalHeight    |
| 15 | UdpInjectValve     | Inject                                               |
| 16 | UdpDispense        | Drain, 22.400 [μl], GlobalSpeed, GlobalHeight        |
| 17 | UdpSyringeValve    | Needle                                               |
| 18 | UdpMixNeedleWash   | 50 [μl]                                              |
| 19 | UdpMoveSyringeHome | GlobalSpeed                                          |

**Table S1.** Program for operation of auto-sampler (same in both methods). Reagent B vial contained 0.1% formic acid in acetonitrile. Reagent A vial contained 0.1% formic acid in water.

| #MS Type | Cycle Id | Start IM [1/K0] | End IM [1/K0] | Start Mass [m/z] | End Mass [m/z] | CE [eV] |
|----------|----------|-----------------|---------------|------------------|----------------|---------|
| MS1      | 0        | -               | -             | -                | -              | -       |
| PASEF    | 1        | 1.0711          | 1.3447        | 1000             | 1040           | -       |
| PASEF    | 1        | 0.8342          | 1.0511        | 640              | 680            | -       |
| PASEF    | 1        | 0.65            | 0.8226        | 360              | 400            | -       |
| PASEF    | 2        | 1.0974          | 1.3774        | 1040             | 1080           | -       |
| PASEF    | 2        | 0.8605          | 1.0837        | 680              | 720            | -       |
| PASEF    | 2        | 0.6763          | 0.8553        | 400              | 440            | -       |
| PASEF    | 3        | 0.9132          | 1.1489        | 760              | 800            | -       |
| PASEF    | 3        | 0.7026          | 0.8879        | 440              | 480            | -       |
| PASEF    | 4        | 0.9395          | 1.1816        | 800              | 840            | -       |
| PASEF    | 4        | 0.7289          | 0.9205        | 480              | 520            | -       |
| PASEF    | 5        | 0.9658          | 1.2142        | 840              | 880            | -       |
| PASEF    | 5        | 0.7553          | 0.9532        | 520              | 560            | -       |
| PASEF    | 6        | 0.9921          | 1.2468        | 880              | 920            | -       |
| PASEF    | 6        | 0.7816          | 0.9858        | 560              | 600            | -       |
| PASEF    | 7        | 1.0184          | 1.2795        | 920              | 960            | -       |
| PASEF    | 7        | 0.8079          | 1.0184        | 600              | 640            | -       |
| PASEF    | 8        | 1.1237          | 1.41          | 1080             | 1120           | -       |
| PASEF    | 8        | 0.8868          | 1.1163        | 720              | 760            | -       |
| PASEF    | 9        | 1.0447          | 1.3121        | 960              | 1000           | -       |

**Table S2.** DIA isolation window scheme for DIA-PASEF method optimized for the presented platform and whole blood from Mitra devices.

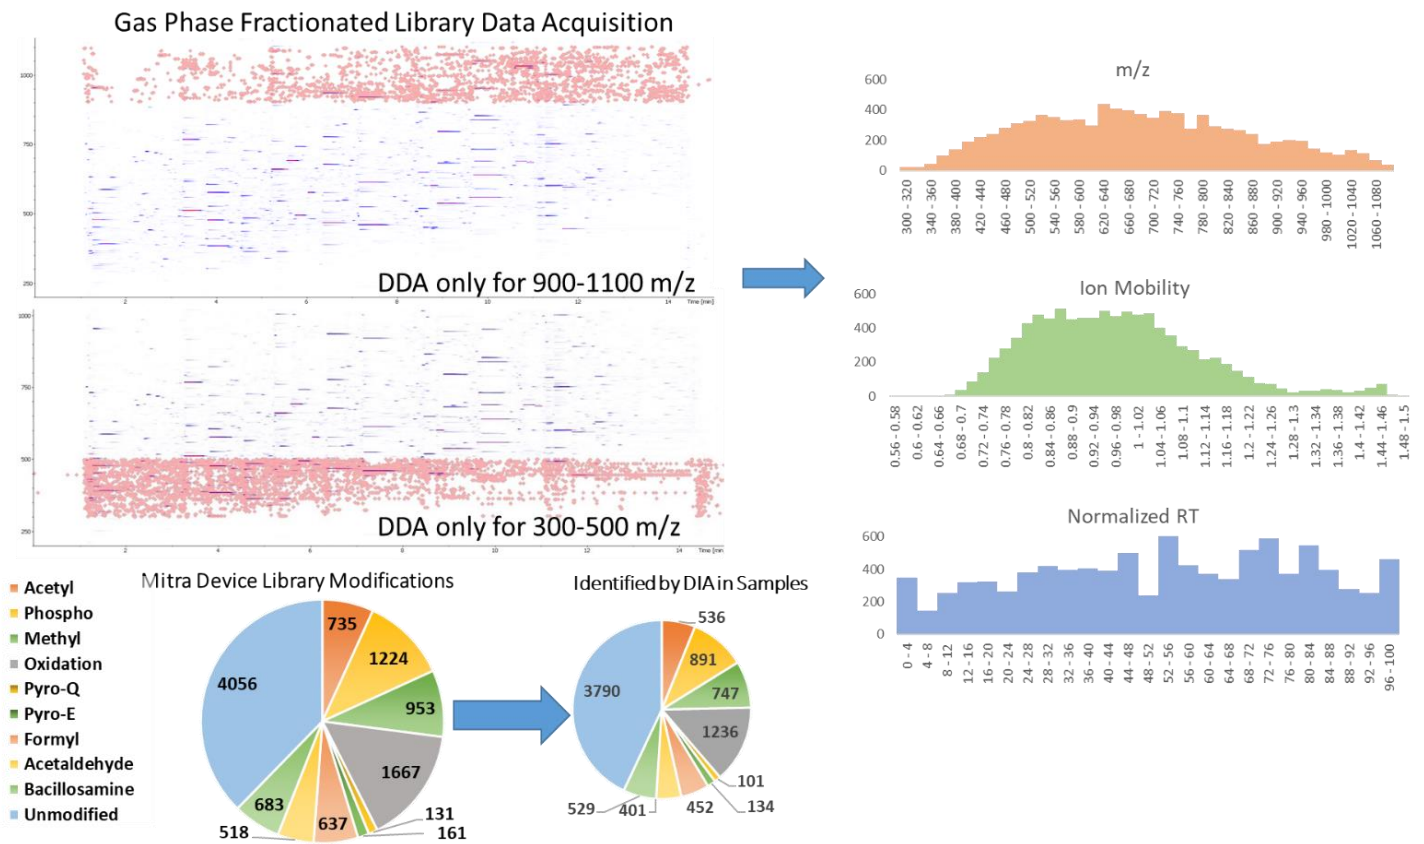

**Figure S1.** Gas phased fractionated data dependent acquisition was used to generate the library for analysis of blood from Mitra devices. In each run the  $m/z$  range of precursors allowed for fragmentation was limited to 200  $m/z$ , top left are two example heat-maps that show the detected precursor ions while the pink diamonds indicate those which were fragmented. The histograms on the left represent the  $m/z$ , ion mobility, and retention time (RT) distribution of the identified precursor ions that were incorporated into the library. The pie charts present the modifications which were identified in the library (bottom left) and later identified in DIA analysis of the Mitra device samples. (bottom right)

## PASEF-DIA Scheme and Reproducibility

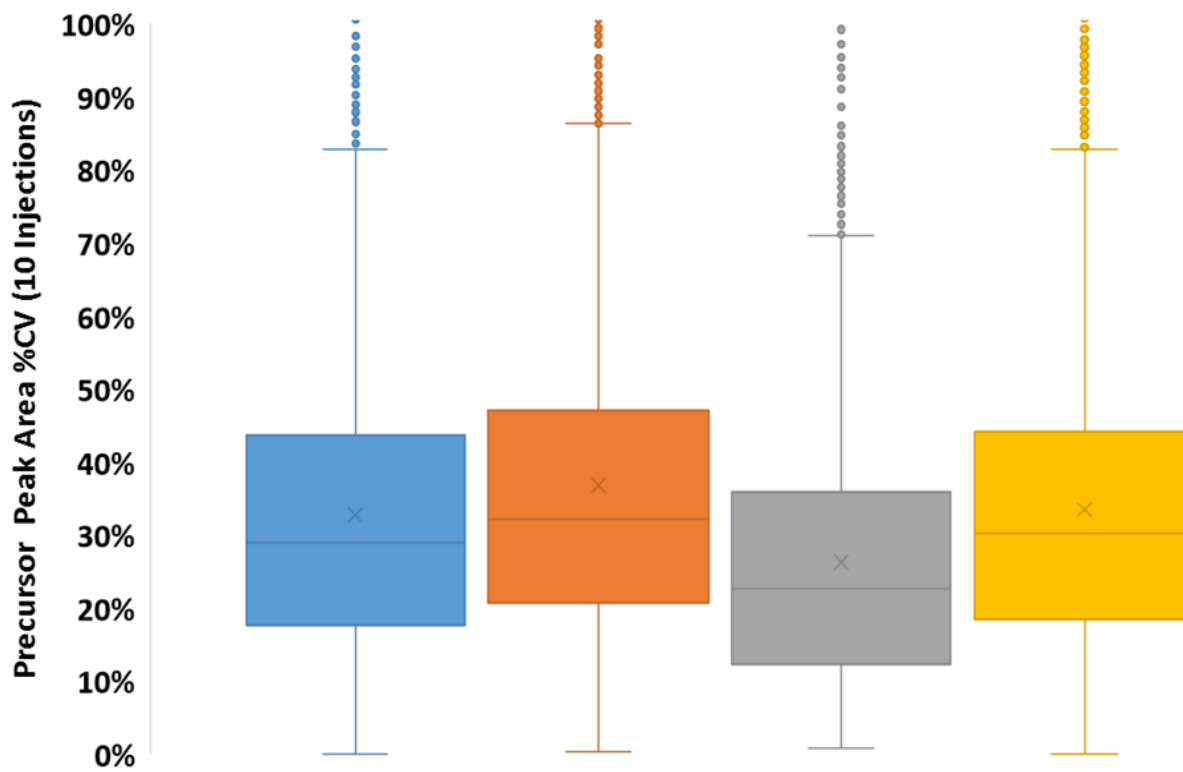

|                              | 60ms ramp<br>25mz IW | 85ms ramp<br>50mz IW | 70ms ramp<br>50mz IW | 50ms ramp<br>30mz IW |
|------------------------------|----------------------|----------------------|----------------------|----------------------|
| <b>Median CV</b>             | 29%                  | 32%                  | 23%                  | 30%                  |
| <b>Average CV</b>            | 33%                  | 37%                  | 26%                  | 33%                  |
| <b>Quantified Precursors</b> | 3765                 | 3985                 | 3985                 | 3884                 |
| <b>Average Precursors</b>    | 3379                 | 3616                 | 3697                 | 3525                 |
| <b>MS2 Scans FWHM</b>        | 2.9                  | 2.7                  | 3.1                  | 2.7                  |

**Figure S2.** Optimization of DIA scheme for 15 minute run time. Increasing the number of MS2 scans at across the peak (MS2 scans FWHM) reduced quantitative variance (%CV) and the best method used a 70 ms ramp with 50 m/z wide isolation windows. The final DIA method used a 70 ms ramp and 40 m/z windows but a more focused precursor m/z and mobility range which resulted at 0.76 s data acquisition cycle and 3.3 to 4.0 MS2 scans at FWHM in subsequent experiments.

|              | <b>F1</b> | <b>AP</b> | <b>Recall</b> | <b>Specificity</b> | <b>Accuracy</b> | <b>AUROC</b> | <b>AUPR</b> |
|--------------|-----------|-----------|---------------|--------------------|-----------------|--------------|-------------|
| <b>Dummy</b> | 0.682927  | 0.518519  | 1.000000      | 0.000000           | 0.518519        | 0.500000     | 0.759259    |
| <b>ET</b>    | 0.756757  | 0.608696  | 1.000000      | 0.307692           | 0.666667        | 0.901099     | 0.913790    |
| <b>GB</b>    | 0.764706  | 0.640608  | 0.928571      | 0.461538           | 0.703704        | 0.774725     | 0.755464    |
| <b>LR</b>    | 0.823529  | 0.700000  | 1.000000      | 0.538462           | 0.777778        | 0.873626     | 0.876529    |
| <b>RF</b>    | 0.800000  | 0.666667  | 1.000000      | 0.461538           | 0.740741        | 0.807692     | 0.790904    |
| <b>SVC</b>   | 0.823529  | 0.700000  | 1.000000      | 0.538462           | 0.777778        | 0.873626     | 0.876529    |

**Table S3.** Scores of different classifier models used to distinguish normal controls from hypertension patients.

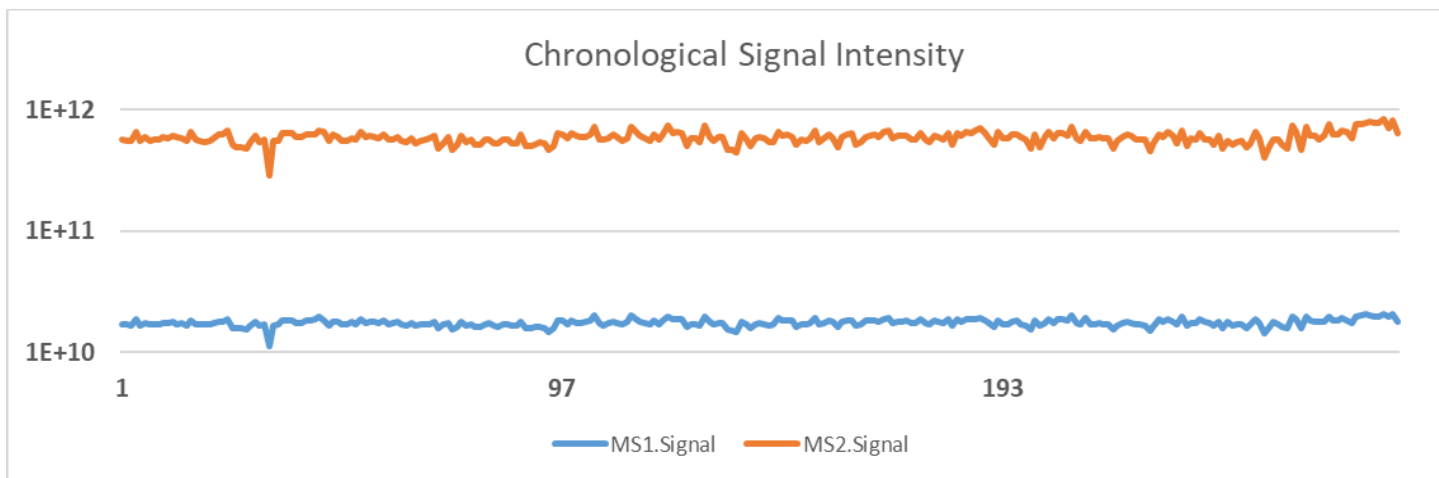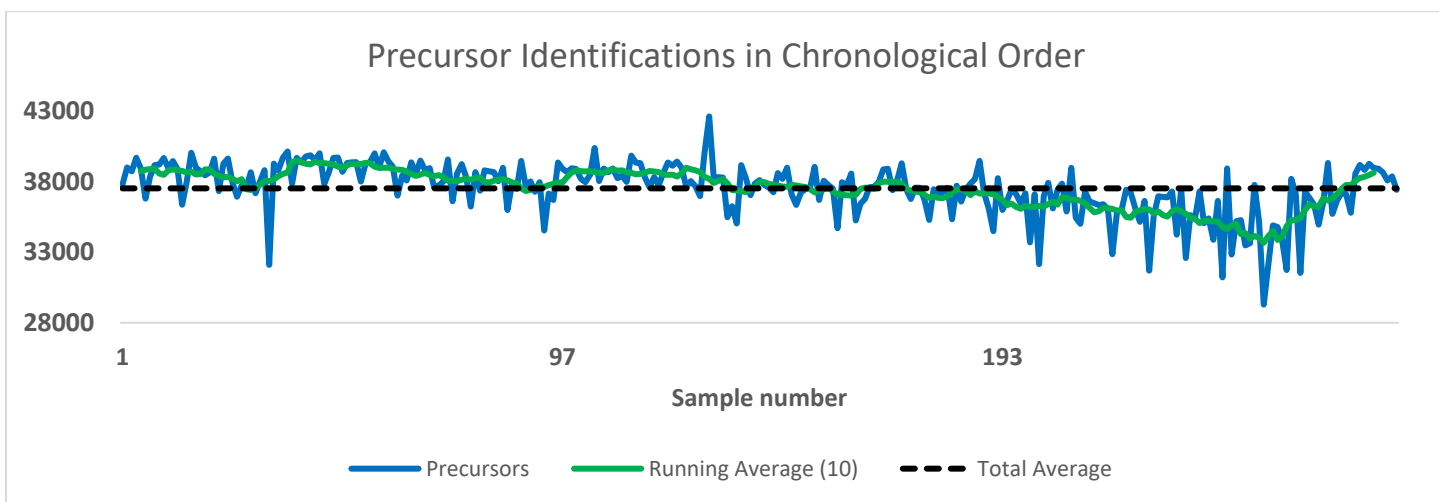

|   | 1    | 2    | 3    | 4    | 5    | 6    | 7    | 8    | 9    | 10   | 11   | 12   |
|---|------|------|------|------|------|------|------|------|------|------|------|------|
| A | 36.6 | 38.2 | 37.1 | 39.0 | 36.1 | 36.6 | 37.5 | 36.6 | 37.8 | 38.2 | 39.3 | 39.2 |
| B | 37.5 | 36.0 | 32.2 | 35.4 | 32.9 | 31.7 | 32.6 | 31.2 | 35.1 | 37.1 | 35.7 | 38.8 |
| C | 37.9 | 36.7 | 37.0 | 35.0 | 35.9 | 35.6 | 35.6 | 38.9 | 29.3 | 31.5 | 36.7 | 39.3 |
| D | 38.2 | 37.5 | 37.9 | 37.3 | 36.0 | 37.0 | 35.4 | 32.8 | 32.1 | 37.3 | 37.2 | 39.0 |
| E | 39.5 | 37.1 | 36.1 | 36.6 | 37.4 | 36.9 | 37.3 | 35.2 | 34.9 | 36.8 | 38.4 | 38.9 |
| F | 37.2 | 36.4 | 37.4 | 36.5 | 37.2 | 36.9 | 35.1 | 35.3 | 34.8 | 36.3 | 37.1 | 38.7 |
| G | 36.1 | 37.2 | 37.9 | 36.3 | 36.1 | 37.3 | 35.4 | 33.5 | 33.9 | 35.0 | 35.8 | 38.1 |
| H | 34.5 | 33.7 | 35.9 | 36.4 | 35.2 | 34.3 | 33.9 | 33.6 | 31.7 | 36.5 | 38.6 | 37.4 |

**Figure S3.** Platform Performance across the cell lysate analysis. Top – MS1 and MS2 signal over course of the experiment. Middle – identifications over the course of the cell lysate analysis. Bottom – precursor identifications across plate 3 which had the highest variability.
